# Supplementary material
Source: PubMed Central journal article supplement (PMC9473155)

**Supplementary Data**

PICO Question 1: Should proton pump inhibitors be used in patients with esophageal eosinophilia?

PICO Question 2: Should topical glucocorticosteroids be used in patients with EoE?

PICO Question 3: Should systemic glucocorticosteroids be used in patients with EoE?

Forest plot not shown (only 1 study).

PICO Question 4: Should an elemental diet be used in patients with EoE?

PICO Question 5: Should an empiric food elimination diet be used in patients with EoE?

PICO Question 6: Should allergy-based testing be used for the purpose of identifying food triggers in patients with EoE?

PICO Question 7: Should maintenance therapy be recommended in patients with EoE?

Forest Plot not shown (only 1 study).

PICO Question 8: Should esophageal dilation be used in patients with EoE?

PICO Question 9: Should anti-IL-5 therapy be used in patients with EoE?

PICO Question 10: Should anti-IL-13 therapy be used in patients with EoE?

Forest plot not shown (only 1 study)

PICO Question 11: Should anti-IgE therapy be used in patients with EoE?

Forest plot not shown (only 1 study)

PICO Question 12: Should montelukast be used in patients with EoE?

Forest plot not shown (only 1 study)

PICO Question 13: Should cromolyn be used in patients with EoE?

Forest plot not shown (only 1 study)

PICO Question 14: Should anti-TNFs be used in pts with EoE?

Forest plot not shown (only 1 study)

PICO Question 15: Should immunomodulators be used in the treatment of EoE?

Forest plot not shown (only 1 study)

**Supplementary Table 1**  
PICO Questions

| Question no. | Question                                                                                                | PICO question                                                  |                                                                                                               |                             |                                                                                     | Method |
|--------------|---------------------------------------------------------------------------------------------------------|----------------------------------------------------------------|---------------------------------------------------------------------------------------------------------------|-----------------------------|-------------------------------------------------------------------------------------|--------|
|              |                                                                                                         | Population                                                     | Intervention(s)                                                                                               | Comparator                  | Outcome                                                                             |        |
| 1            | Should PPIs be used in patients with symptomatic esophageal eosinophilia?                               | Esophageal eosinophilia, not necessarily meeting EoE criteria  | PPI                                                                                                           | Placebo                     | Failing to achieve histologic remission (<15 eos/hpf)<br>Symptoms<br>Adverse events | GRADE  |
| 2            | Should topical glucocorticosteroids be used in patients with EoE?                                       | Patients with EoE                                              | Topical steroids                                                                                              | Placebo                     | Failing to achieve histologic remission (<15 eos/hpf)<br>Symptoms<br>Adverse events | GRADE  |
| 3            | Should systemic glucocorticosteroids be used in patients with EoE?                                      | Patients with EoE                                              | Systemic steroids                                                                                             | Placebo or topical steroids | Failing to achieve histologic remission (<15 eos/hpf)<br>Symptoms<br>Adverse events | GRADE  |
| 4            | Should an elemental diet be used in patients with EoE?                                                  | Patients with EoE                                              | Elemental diet                                                                                                | No diet change              | Failing to achieve histologic remission (<15 eos/hpf)<br>Symptoms<br>Adverse events | GRADE  |
| 5            | Should an empiric elimination diet be used in patients with EoE?                                        | Patients with EoE                                              | 6-food elimination diet<br>4-food elimination diet<br>2-food elimination diet<br>Single-food elimination diet | No elimination diet         | Failing to achieve histologic remission (<15 eos/hpf)<br>Symptoms<br>Adverse events | GRADE  |
| 6            | Should allergy-based testing be used for the purpose of identifying food triggers in patients with EoE? | Patients with EoE                                              | SPT, sIgE, APT, and/or CRD to direct an elimination diet                                                      | No elimination diet         | Failing to achieve histologic remission (<15 eos/hpf)<br>Symptoms<br>Adverse events | GRADE  |
| 7            | Is maintenance therapy recommended in patients with EoE?                                                | Patients with EoE who are in clinical and histologic remission | Maintaining therapy                                                                                           | Discontinuing therapy       | Failing to achieve histologic remission (<15 eos/hpf)<br>Symptoms<br>Adverse events | GRADE  |
| 8            | Should esophageal dilation be used in patients with EoE?                                                | Patients with EoE                                              | Dilation                                                                                                      | No dilation                 | Adverse events                                                                      | GRADE  |
| 9            | Should anti-IL-5 therapy be used in patients with EoE?                                                  | Patients with EoE                                              | Anti-IL-5 therapy                                                                                             | Placebo                     | Failing to achieve histologic remission (<15 eos/hpf)<br>Symptoms<br>Adverse events | GRADE  |
| 10           | Should anti-IL-13 therapy be used in patients with EoE?                                                 | Patients with EoE                                              | Anti-IL-13 therapy                                                                                            | Placebo                     | Failing to achieve histologic remission (<15 eos/hpf)<br>Symptoms<br>Adverse events | GRADE  |
| 11           | Should anti-IgE therapy be used in patients with EoE?                                                   | Patients with EoE                                              | Anti-IgE therapy                                                                                              | Placebo                     | Failing to achieve histologic remission (<15 eos/hpf)<br>Symptoms<br>Adverse events | GRADE  |
| 12           | Should montelukast be used in patients with EoE?                                                        | Patients with EoE                                              | Montelukast                                                                                                   | Placebo                     | Failing to achieve histologic remission (<15 eos/hpf)<br>Symptoms<br>Adverse events | GRADE  |
| 13           | Should cromolyn be used in patients with EoE?                                                           | Patients with EoE                                              | Cromolyn                                                                                                      | Placebo                     | Failing to achieve histologic remission (<15 eos/hpf)<br>Symptoms<br>Adverse events | GRADE  |
| 14           | Should anti-TNFs be used in patients with EoE?                                                          | Patients with EoE                                              | Anti-TNF                                                                                                      | Placebo                     | Failing to achieve histologic remission (<15 eos/hpf)<br>Symptoms<br>Adverse events | GRADE  |

|    |                                                                                      |                                                  |                                                                          |                                |                                                                                     |           |
|----|--------------------------------------------------------------------------------------|--------------------------------------------------|--------------------------------------------------------------------------|--------------------------------|-------------------------------------------------------------------------------------|-----------|
| 15 | Should immunomodulators be used in patients with EoE?                                | Patients with EoE                                | Azathioprine or 6-MP                                                     | Placebo                        | Failing to achieve histologic remission (<15 eos/hpf)<br>Symptoms<br>Adverse events | GRADE     |
| 16 | Should repeat EGD be used to assess patients with EoE after a change in treatment?   | Patients with EoE                                | EGD with esophageal biopsy                                               | NA                             | NA                                                                                  | Narrative |
| 17 | What is the management of patients who become asymptomatic on initial PPI treatment? | Patients with esophageal eosinophilia and/or EoE | Repeat EGD, followed by additional therapy if eosinophils still elevated | No EGD, no change in treatment | Failing to achieve histologic remission (<15 eos/hpf)<br>Symptoms<br>Adverse events | Narrative |

Abbreviations: ATP, atopy patch test; CRD, component-resolved diagnostics; EGD, esophagogastroduodenoscopy; 6-MP, 6-mercaptopurine; sIgE, specific IgE; SPT, skin-prick test.

**Supplementary Table 2**

## Summary of Eosinophilic Esophagitis Outcomes Considered

| Name of outcome                        | Definition                                          | Minimally important difference                                                                  | Rating (1–9) | Critical vs important vs nonimportant |
|----------------------------------------|-----------------------------------------------------|-------------------------------------------------------------------------------------------------|--------------|---------------------------------------|
| Histology                              | Eosinophil counts <15/hpf in esophagus              | Not known                                                                                       | 8            | Critical                              |
|                                        |                                                     | Response: 30%–50% improvement                                                                   | 6            |                                       |
| Symptoms                               | DSQ, MDQ, EEsAI, PEES                               | Remission: absence of symptoms.<br>For EEsAI, score <30 may indicate inactive disease/remission |              | Important                             |
| Endoscopic findings                    | Eosinophilic esophagitis endoscopic reference score | Response: 30%–50% improvement<br>Remission: normalization                                       | 6            | Important                             |
| Complications of EoE                   | Stricture                                           | NA                                                                                              | 8            | Critical                              |
|                                        | Food impaction                                      |                                                                                                 |              |                                       |
|                                        | Malnutrition psychiatric                            |                                                                                                 |              |                                       |
| Quality of life                        | Pediatric EoE QL<br>Adult EoE QL                    | Response: 30%–50% improvement as response<br>Remission: baseline for healthy people             | 6            | Important                             |
| Biomarkers                             | Peripheral eos                                      | NA                                                                                              | 4            | Not important                         |
|                                        | Progenitor eos                                      |                                                                                                 |              |                                       |
|                                        | Gene expression                                     |                                                                                                 |              |                                       |
|                                        | Cytosponge                                          |                                                                                                 |              |                                       |
|                                        | EST readout                                         |                                                                                                 |              |                                       |
| Adverse events of medication treatment | Tissue cytokines eosinophil granules                |                                                                                                 |              |                                       |
|                                        | Allergy                                             | NA                                                                                              | 6            | Important                             |
|                                        | Weight gain                                         |                                                                                                 |              |                                       |
|                                        | Anaphylaxis                                         |                                                                                                 |              |                                       |
| Complications of endoscopy             | Infections                                          |                                                                                                 |              |                                       |
|                                        | Perforation                                         | NA                                                                                              | 8            | Critical                              |
| Costs                                  | Anesthesia complications                            |                                                                                                 |              |                                       |
|                                        |                                                     | NA                                                                                              | 6            | Important                             |

Abbreviations: DSQ, dysphagia symptoms questionnaire; EEsAI, eosinophilic esophagitis activity index; EST, esophageal string test; MDQ, Mayo Dysphagia Questionnaire; NA, not applicable; PEES, Pediatric Eosinophilic Esophagitis Symptom Scores; QL, quality of life.

**Supplementary Table 3**

## Electronic Search Strategies: Eosinophilic Esophagitis–Final Search

Search date: May 13, 2018

Databases searched: Ovid MEDLINE: Epub Ahead of Print, In-Process &amp; Other Non-Indexed Citations, Ovid MEDLINE® Daily and Ovid MEDLINE® 1946–Present, Embase Classic+Embase 1947 to 2018 May 11; Wiley Cochrane. Individual systematic review searches were not registered in Prospero, as this technical report represents an umbrella evidence review.

Ovid MEDLINE(R), Embase

| No. | Searches                                                                                                                                                                                                                                              | Results |
|-----|-------------------------------------------------------------------------------------------------------------------------------------------------------------------------------------------------------------------------------------------------------|---------|
| 1   | exp Eosinophilic Esophagitis/                                                                                                                                                                                                                         | 5991    |
| 2   | (eosinophilic adj2 (esophagitis or oesophagitis)).ti,ab.                                                                                                                                                                                              | 6556    |
| 3   | 1 or 2                                                                                                                                                                                                                                                | 7480    |
| 4   | exp EOSINOPHILIA/                                                                                                                                                                                                                                     | 62171   |
| 5   | exp ESOPHAGITIS/                                                                                                                                                                                                                                      | 45445   |
| 6   | exp ESOPHAGUS/                                                                                                                                                                                                                                        | 133201  |
| 7   | 4 and (5 or 6)                                                                                                                                                                                                                                        | 2855    |
| 8   | eo.e.ti,ab.                                                                                                                                                                                                                                           | 3588    |
| 9   | 3 and (7 or 8)                                                                                                                                                                                                                                        | 4580    |
| 10  | exp Adrenal Cortex Hormones/ use ppez                                                                                                                                                                                                                 | 376133  |
| 11  | exp corticosteroid/ use emczd                                                                                                                                                                                                                         | 935731  |
| 12  | (corticosteroid* or steroid* or prednisone or budesonide or fluticasone).ti,ab.                                                                                                                                                                       | 786701  |
| 13  | exp Leukotriene Antagonists/ use ppez                                                                                                                                                                                                                 | 2974    |
| 14  | exp leukotriene receptor blocking agent/ use emczd                                                                                                                                                                                                    | 18407   |
| 15  | exp montelukast/ use emczd                                                                                                                                                                                                                            | 8443    |
| 16  | (montelukast or singulair).mp.                                                                                                                                                                                                                        | 10840   |
| 17  | exp Proton Pump Inhibitors/ use ppez                                                                                                                                                                                                                  | 16773   |
| 18  | exp proton pump inhibitor/ use emczd                                                                                                                                                                                                                  | 68622   |
| 19  | (proton pump inhibitor* or PPI* or omeprazole or Prilosec or Yosprala or lansoprazole or Prevacid or dexlansoprazole or Dexilent or rabeprazole or Aciphex or pantoprazole or Protonix or esomeprazole or Nexium or Vimovo or Zegerid).ti,ab.         | 88470   |
| 20  | exp monoclonal antibody/ use emczd                                                                                                                                                                                                                    | 480638  |
| 21  | exp Antibodies, Monoclonal, Humanized/ use ppez                                                                                                                                                                                                       | 39896   |
| 22  | exp Interleukin-5/ai [Antagonists & Inhibitors]                                                                                                                                                                                                       | 293     |
| 23  | exp Receptors, Interleukin-5/ai [Antagonists & Inhibitors]                                                                                                                                                                                            | 31      |
| 24  | exp interleukin 5/ use emczd                                                                                                                                                                                                                          | 25332   |
| 25  | (anti-il-5* or Interleukin-5 or Mepolizumab or nucala or Reslizumab or Cinqair or Benralizumab or fasenra).ti,ab.                                                                                                                                     | 6850    |
| 26  | exp Interleukin-13/ai [Antagonists & Inhibitors]                                                                                                                                                                                                      | 219     |
| 27  | interleukin 13/ use emczd                                                                                                                                                                                                                             | 20432   |
| 28  | exp Interleukin-4/ai [Antagonists & Inhibitors]                                                                                                                                                                                                       | 501     |
| 29  | exp interleukin 4/ use emczd                                                                                                                                                                                                                          | 71100   |
| 30  | (Dupilumab or Dupixent or anti-il-13* or anti-il-4* or Interleukin-13 or Interleukin-4).ti,ab.                                                                                                                                                        | 26804   |
| 31  | exp Immunoglobulin E/ai [Antagonists & Inhibitors]                                                                                                                                                                                                    | 20      |
| 32  | immunoglobulin e/ use emczd or immunoglobulin e antibody/ use emczd                                                                                                                                                                                   | 80681   |
| 33  | (anti-IgE or Omalizumab or Xolair).mp.                                                                                                                                                                                                                | 14248   |
| 34  | exp Dilatation/ use ppez                                                                                                                                                                                                                              | 10447   |
| 35  | exp esophagus dilatation/ use emczd                                                                                                                                                                                                                   | 3265    |
| 36  | (dilation or dilatation).ti,ab.                                                                                                                                                                                                                       | 210743  |
| 37  | exp Immunologic Factors/ use ppez                                                                                                                                                                                                                     | 1274605 |
| 38  | exp immunomodulating agent/ use emczd                                                                                                                                                                                                                 | 1045440 |
| 39  | immunomodulator*.ti,ab.                                                                                                                                                                                                                               | 93101   |
| 40  | exp Mercaptopurine/                                                                                                                                                                                                                                   | 46362   |
| 41  | (6-Mercaptopurine or 6-MP or Purinethol or Purixan or azothioprine or Azathioprine or Azasan or Imuran).ti,ab.                                                                                                                                        | 46642   |
| 42  | exp Tumor Necrosis Factor-alpha/ai [Antagonists & Inhibitors]                                                                                                                                                                                         | 14168   |
| 43  | tumor necrosis factor inhibitor/ use emczd                                                                                                                                                                                                            | 10354   |
| 44  | (Infliximab or remicade or adalimumab or humira or golimumab or simponi or vedolizumab or entyvio or tofacitinib or Xeljanz or Jakvinsus).ti,ab.                                                                                                      | 45437   |
| 45  | exp Cromolyn Sodium/ use ppez                                                                                                                                                                                                                         | 4044    |
| 46  | exp cromoglycate disodium/ use emczd                                                                                                                                                                                                                  | 15471   |
| 47  | cromolyn.ti,ab.                                                                                                                                                                                                                                       | 2968    |
| 48  | Food Hypersensitivity/di [Diagnosis]                                                                                                                                                                                                                  | 6271    |
| 49  | exp Protein Array Analysis/ use ppez                                                                                                                                                                                                                  | 7467    |
| 50  | exp IMMUNOASSAY/ use ppez                                                                                                                                                                                                                             | 475054  |
| 51  | exp allergy test/ use emczd or exp food allergy/ use emczd                                                                                                                                                                                            | 35286   |
| 52  | (Component Resolved Diagnostic Testing or crd).ti,ab.                                                                                                                                                                                                 | 6533    |
| 53  | (test* adj2 (allerg* or hypersensitiv*).ti,ab.                                                                                                                                                                                                        | 17189   |
| 54  | or/10-53                                                                                                                                                                                                                                              | 4631827 |
| 55  | 9 and 54                                                                                                                                                                                                                                              | 2875    |
| 56  | (Randomized Controlled Trial or Pragmatic Clinical Trial or meta-analysis).pt.                                                                                                                                                                        | 550035  |
| 57  | exp Randomized Controlled Trials as Topic/                                                                                                                                                                                                            | 263799  |
| 58  | “Randomized Controlled Trial (topic)”/                                                                                                                                                                                                                | 145282  |
| 59  | Randomized Controlled Trial/ or Randomization/ or Random Allocation/ or Double-Blind Method/ or Double Blind Procedure/ or Double-Blind Studies/ or Single-Blind Method/ or Single Blind Procedure/ or Single-Blind Studies/ or Placebos/ or Placebo/ | 1420748 |
| 60  | meta-analysis/ or systematic review/ or meta-analysis as topic/ or “meta analysis (topic)”/ or “systematic review (topic)”/ or exp technology assessment, biomedical/                                                                                 | 416180  |
| 61  | (random* or sham or placebo*).ti,ab,hw,kf,kw.                                                                                                                                                                                                         | 3100357 |
| 62  | ((singl* or doubl*) adj (blind* or dumm* or mask*).ti,ab,hw,kf,kw.                                                                                                                                                                                    | 491550  |
| 63  | ((tripl* or trebl*) adj (blind* or dumm* or mask*).ti,ab,hw,kf,kw.                                                                                                                                                                                    | 1696    |
| 64  | ((systematic* adj3 (review* or overview*) or (methodologic* adj3 (review* or overview*))).ti,ab,kf,kw.                                                                                                                                                | 303565  |
| 65  | ((quantitative adj3 (review* or overview* or synthes*)) or (research adj3 (integrati* or overview*))).ti,ab,kf,kw.                                                                                                                                    | 19173   |
| 66  | ((integrative adj3 (review* or overview*)) or (collaborative adj3 (review* or overview*)) or (pool* adj3 analy*).ti,ab,kf,kw.                                                                                                                         | 49299   |

(continued on next page)

Supplementary Table 3 (continued)

| No.            | Searches                                                                                                                                                                                                                                                                                                                                                                                                     | Results |
|----------------|--------------------------------------------------------------------------------------------------------------------------------------------------------------------------------------------------------------------------------------------------------------------------------------------------------------------------------------------------------------------------------------------------------------|---------|
| 67             | (data syntheses* or data extraction* or data abstraction* or handsearch* or hand search or mantel haenszel or peto or der simonian or dersimonian or fixed effect* or latin square* or met analy* or metanaly* or technology assessment* or HTA or HTAs or technology overview* or technology appraisal* or meta regression* or metaregression* or outcomes research or relative effectiveness).ti,ab,kf,kw. | 151747  |
| 68             | (cochrane or (health adj2 technology assessment) or evidence report).jw.                                                                                                                                                                                                                                                                                                                                     | 44072   |
| 69             | (meta-analy* or metaanaly* or systematic review* or biomedical technology assessment* or bio-medical technology assessment*).mp,hw.                                                                                                                                                                                                                                                                          | 594805  |
| 70             | (medline or cochrane or pubmed or medlars or embase or cinahl).ti,ab,hw.                                                                                                                                                                                                                                                                                                                                     | 387579  |
| 71             | (meta-analysis or systematic review).md.                                                                                                                                                                                                                                                                                                                                                                     | 0       |
| 72             | (comparative adj3 (efficacy or effectiveness)).ti,ab,kf,kw.                                                                                                                                                                                                                                                                                                                                                  | 27349   |
| 73             | ((indirect or indirect treatment or mixed-treatment) adj comparison*).ti,ab,kf,kw.                                                                                                                                                                                                                                                                                                                           | 4938    |
| 74             | or/56-73                                                                                                                                                                                                                                                                                                                                                                                                     | 3749981 |
| 75             | 55 and 74                                                                                                                                                                                                                                                                                                                                                                                                    | 420     |
| 76             | exp diet therapy/                                                                                                                                                                                                                                                                                                                                                                                            | 380595  |
| 77             | (diet* adj2 (6 food or six food or elimination or elemental)).ti,ab.                                                                                                                                                                                                                                                                                                                                         | 5676    |
| 78             | 76 or 77                                                                                                                                                                                                                                                                                                                                                                                                     | 385128  |
| 79             | 9 and 78                                                                                                                                                                                                                                                                                                                                                                                                     | 875     |
| 80             | 75 or 79                                                                                                                                                                                                                                                                                                                                                                                                     | 1166    |
| 81             | animals/ not (humans/ and animals/)                                                                                                                                                                                                                                                                                                                                                                          | 5768520 |
| 82             | 80 not 81                                                                                                                                                                                                                                                                                                                                                                                                    | 1163    |
| 83             | limit 82 to (case reports or comment or editorial or letter or conference abstract or note) [Limit not valid in Ovid MEDLINE(R),Ovid MEDLINE(R) Daily Update,Ovid MEDLINE(R) In-Process,Ovid MEDLINE(R) Publisher,Embase; records were retained]                                                                                                                                                             | 418     |
| 84             | case report/                                                                                                                                                                                                                                                                                                                                                                                                 | 4211687 |
| 85             | 82 not (83 or 84)                                                                                                                                                                                                                                                                                                                                                                                            | 722     |
| 86             | remove duplicates from 85                                                                                                                                                                                                                                                                                                                                                                                    | 496     |
| Wiley Cochrane |                                                                                                                                                                                                                                                                                                                                                                                                              |         |
| ID             | Search Hits                                                                                                                                                                                                                                                                                                                                                                                                  |         |
| #1             | MeSH descriptor: [Eosinophilic Esophagitis] explode all trees                                                                                                                                                                                                                                                                                                                                                | 26      |
| #2             | (eosinophilic near/2 (esophagitis or oesophagitis)).ti,ab                                                                                                                                                                                                                                                                                                                                                    | 126     |
| #3             | #1 or #2                                                                                                                                                                                                                                                                                                                                                                                                     | 128     |
| #4             | MeSH descriptor: [Eosinophilia] explode all trees                                                                                                                                                                                                                                                                                                                                                            | 240     |
| #5             | MeSH descriptor: [Esophagitis] explode all trees                                                                                                                                                                                                                                                                                                                                                             | 680     |
| #6             | MeSH descriptor: [Esophagus] explode all trees                                                                                                                                                                                                                                                                                                                                                               | 1282    |
| #7             | #4 and (#5 or #6)                                                                                                                                                                                                                                                                                                                                                                                            | 36      |
| #8             | eoe:ti,ab                                                                                                                                                                                                                                                                                                                                                                                                    | 86      |
| #9             | #3 or #7 or #8 131                                                                                                                                                                                                                                                                                                                                                                                           |         |
| #10            | MeSH descriptor: [Adrenal Cortex Hormones] explode all trees 13563                                                                                                                                                                                                                                                                                                                                           |         |
| #11            | (corticosteroid* or steroid* or prednisone or budesonide or fluticasone).ti,ab 35079                                                                                                                                                                                                                                                                                                                         |         |
| #12            | MeSH descriptor: [Leukotriene Antagonists] explode all trees                                                                                                                                                                                                                                                                                                                                                 | 439     |
| #13            | (montelukast or singulair).ti,ab 1269                                                                                                                                                                                                                                                                                                                                                                        |         |
| #14            | MeSH descriptor: [Proton Pump Inhibitors] explode all trees                                                                                                                                                                                                                                                                                                                                                  | 1302    |
| #15            | (proton pump inhibitor* or PPI* or omeprazole or Prilosec or Yosprala or lansoprazole or Prevacid or dexlansoprazole or Dexilent or rabeprazole or Aciphex or pantoprazole or Protonix or esomeprazole or Nexium or Vimovo or Zegerid).ti,ab                                                                                                                                                                 | 6841    |
| #16            | MeSH descriptor: [Antibodies, Monoclonal, Humanized] explode all trees                                                                                                                                                                                                                                                                                                                                       | 3971    |
| #17            | MeSH descriptor: [Interleukin-5] explode all trees                                                                                                                                                                                                                                                                                                                                                           | 159     |
| #18            | MeSH descriptor: [Receptors, Interleukin-5] explode all trees                                                                                                                                                                                                                                                                                                                                                | 9       |
| #19            | (anti-il-5* or Interleukin-5 or Mepolizumab or nucala or Reslizumab or Cinqair or Benralizumab or fasenra).ti,ab                                                                                                                                                                                                                                                                                             | 806     |
| #20            | MeSH descriptor: [Interleukin-13] explode all trees                                                                                                                                                                                                                                                                                                                                                          | 81      |
| #21            | MeSH descriptor: [Interleukin-4] explode all trees                                                                                                                                                                                                                                                                                                                                                           | 332     |
| #22            | (Dupilumab or Dupixent or anti-il-13* or anti-il-4* or Interleukin-13 or Interleukin-4).ti,ab                                                                                                                                                                                                                                                                                                                | 873     |
| #23            | MeSH descriptor: [Immunoglobulin E] explode all trees 1287                                                                                                                                                                                                                                                                                                                                                   |         |
| #24            | (anti-IGE or Omalizumab or Xolair).ti,ab                                                                                                                                                                                                                                                                                                                                                                     | 704     |
| #25            | MeSH descriptor: [Dilatation] explode all trees 420                                                                                                                                                                                                                                                                                                                                                          |         |
| #26            | (dilation or dilatation).ti,ab                                                                                                                                                                                                                                                                                                                                                                               | 6065    |
| #27            | MeSH descriptor: [Immunologic Factors] explode all trees                                                                                                                                                                                                                                                                                                                                                     | 8197    |
| #28            | immunomodulator*.ti,ab                                                                                                                                                                                                                                                                                                                                                                                       | 2491    |
| #29            | MeSH descriptor: [Mercaptopurine] explode all trees                                                                                                                                                                                                                                                                                                                                                          | 1304    |
| #30            | (6-Mercaptopurine or 6-MP or Purinethol or Purixan or azothioprine or Azathioprine or Azasan or Imuran).ti,ab                                                                                                                                                                                                                                                                                                | 2101    |
| #31            | MeSH descriptor: [Tumor Necrosis Factor-alpha] explode all trees                                                                                                                                                                                                                                                                                                                                             | 3094    |
| #32            | (Infliximab or remicade or adalimumab or humira or golimumab or simponi or vedolizumab or entyvio or tofacitinib or Xeljanz or Jakvinus).ti,ab                                                                                                                                                                                                                                                               | 3531    |
| #33            | MeSH descriptor: [Cromolyn Sodium] explode all trees 705                                                                                                                                                                                                                                                                                                                                                     |         |
| #34            | cromolyn:ti,ab 332                                                                                                                                                                                                                                                                                                                                                                                           |         |
| #35            | MeSH descriptor: [Food Hypersensitivity] explode all trees                                                                                                                                                                                                                                                                                                                                                   | 731     |
| #36            | MeSH descriptor: [Protein Array Analysis] explode all trees                                                                                                                                                                                                                                                                                                                                                  | 34      |
| #37            | MeSH descriptor: [Immunoassay] explode all trees                                                                                                                                                                                                                                                                                                                                                             | 4804    |
| #38            | (Component Resolved Diagnostic Testing or crd).ti,ab 166                                                                                                                                                                                                                                                                                                                                                     |         |
| #39            | (test* near/2 (allerg* or hypersensitivit*)).ti,ab                                                                                                                                                                                                                                                                                                                                                           | 756     |
| #40            | MeSH descriptor: [Diet Therapy] explode all trees                                                                                                                                                                                                                                                                                                                                                            | 5354    |
| #41            | (diet* near/2 (6 food or six food or elimination or elemental)).ti,ab                                                                                                                                                                                                                                                                                                                                        | 306     |
| #42            | #10 or #11 or #12 or #13 or #14 or #15 or #16 or #17 or #18 or #19 or #20 or #21 or #22 or #23 or #24 or #25 or #26 or #27 or #28 or #29 or #30 or #31 or #32 or #33 or #34 or #35 or #36 or #37 or #38 or #39 or #40 or #41                                                                                                                                                                                 | 86910   |
| #43            | #9 and #42                                                                                                                                                                                                                                                                                                                                                                                                   | 103     |

**Supplementary Table 4**  
Additional Evidence Profile

| Failure to achieve histologic response (assessed with: <15 Eos/hpf) |                   |              |               |                      |                      |                      |                  |              |                       |                                                |             |            |
|---------------------------------------------------------------------|-------------------|--------------|---------------|----------------------|----------------------|----------------------|------------------|--------------|-----------------------|------------------------------------------------|-------------|------------|
| Certainty assessment                                                |                   |              |               |                      |                      |                      | Patients, n (%)  |              | Effect                |                                                | Certainty   | Importance |
| No. of studies                                                      | Study design      | Risk of bias | Inconsistency | Indirectness         | Imprecision          | Other considerations | Topical Steroids | PPI          | Relative, RR (95% CI) | Absolute (95% CI)                              |             |            |
| 2 <sup>27,33</sup>                                                  | Randomized trials | Not serious  | Not serious   | Serious <sup>a</sup> | Serious <sup>b</sup> | None                 | 53/88 (60.2)     | 55/88 (62.5) | 0.96 (0.76–1.22)      | 25 fewer per 1000 (from 137 more to 150 fewer) | ⊕⊕○○<br>LOW | CRITICAL   |

<sup>a</sup>No PPI trial before steroids (so GERD is possible confounder).

<sup>b</sup>Clinical management would vary at ends of CI.

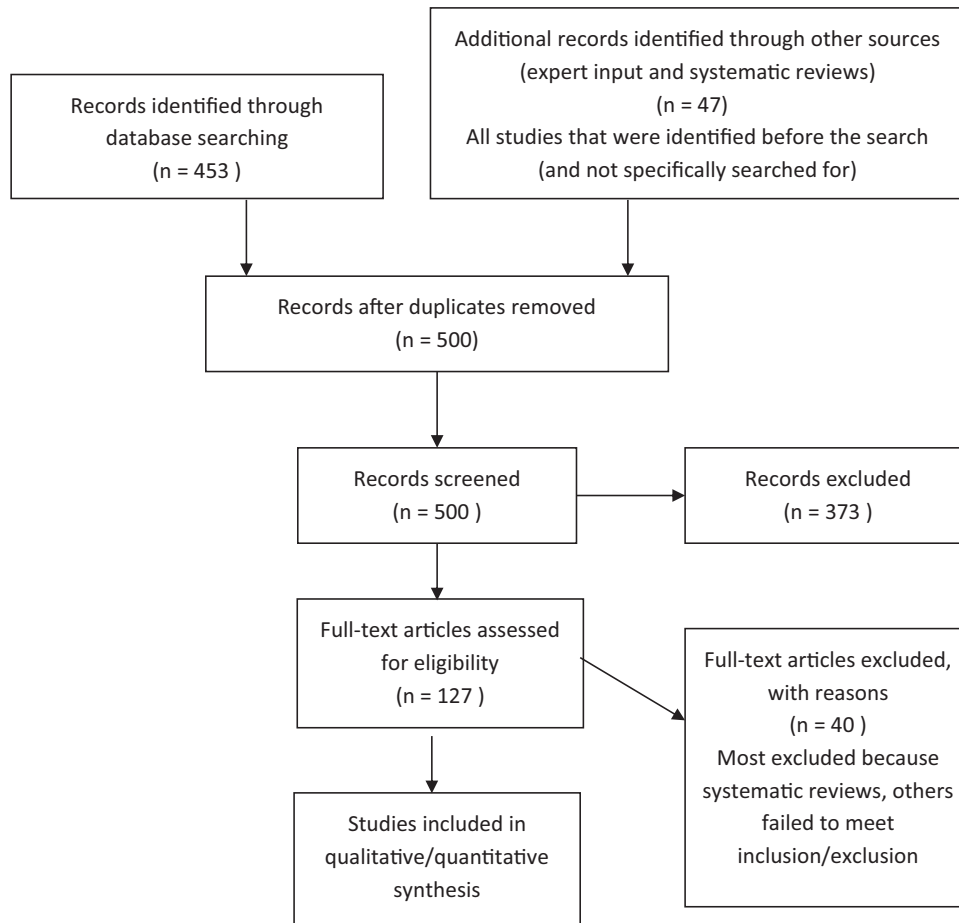

**Supplementary Figure 1.** PRISMA (Preferred Reporting Items for Systematic Reviews and Meta-Analyses) flow diagram.



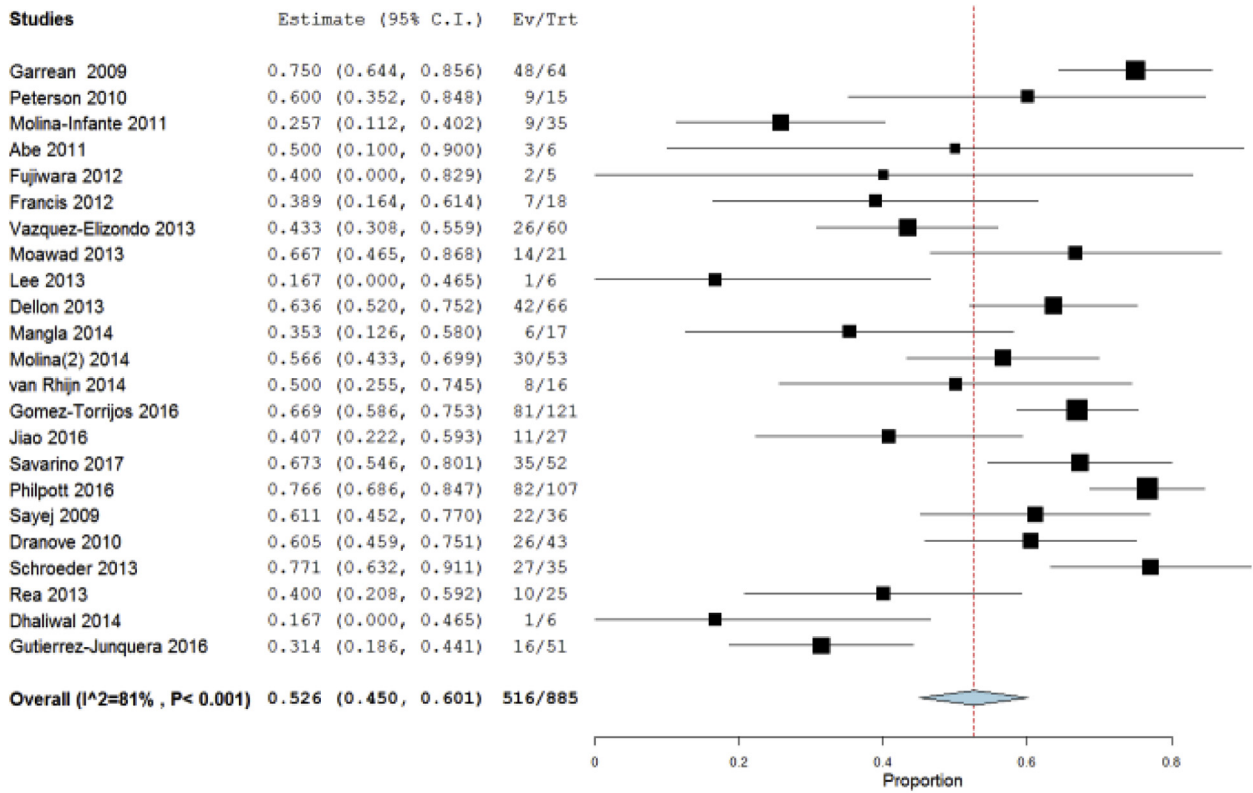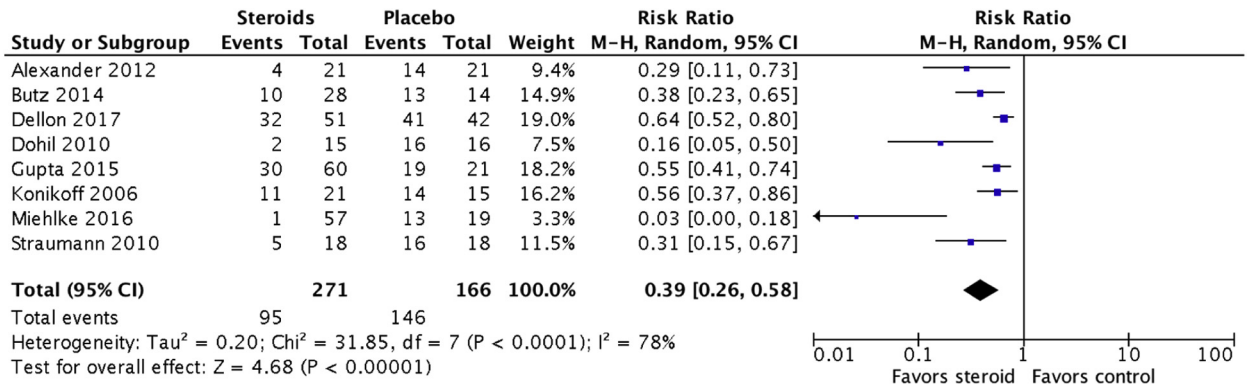

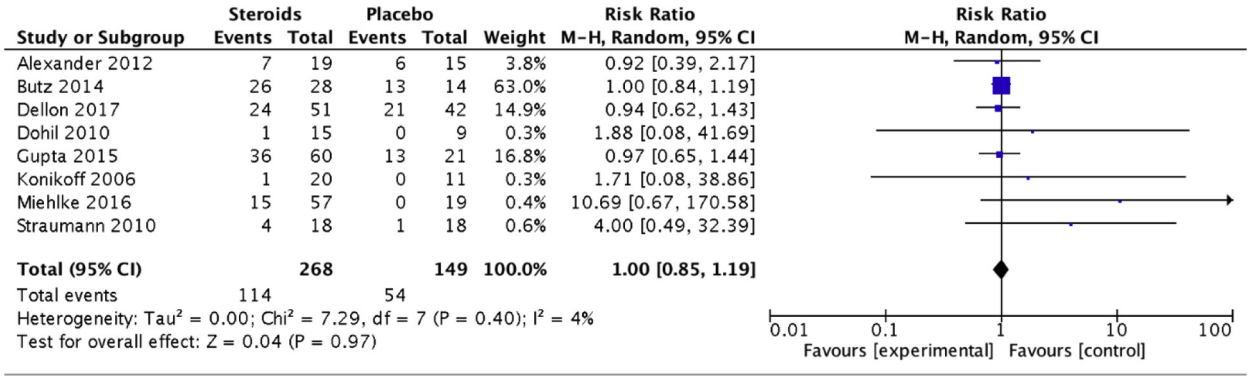

Adverse events in topical steroids compared to placebo

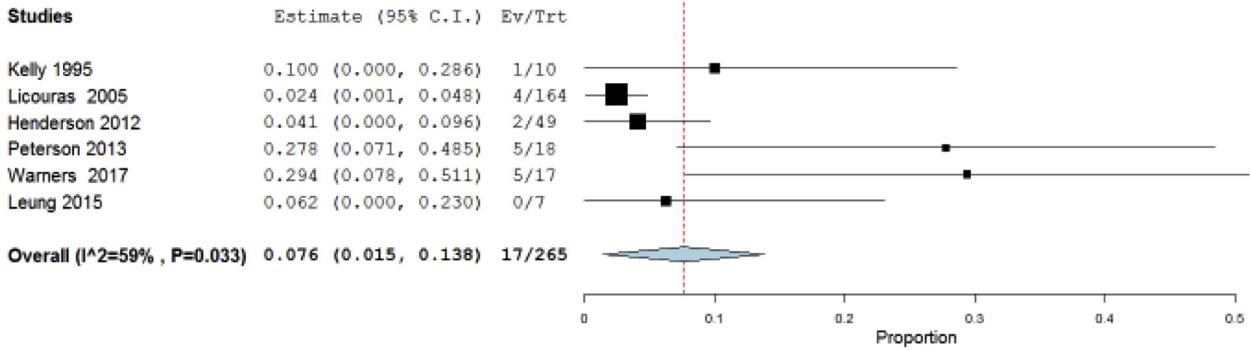

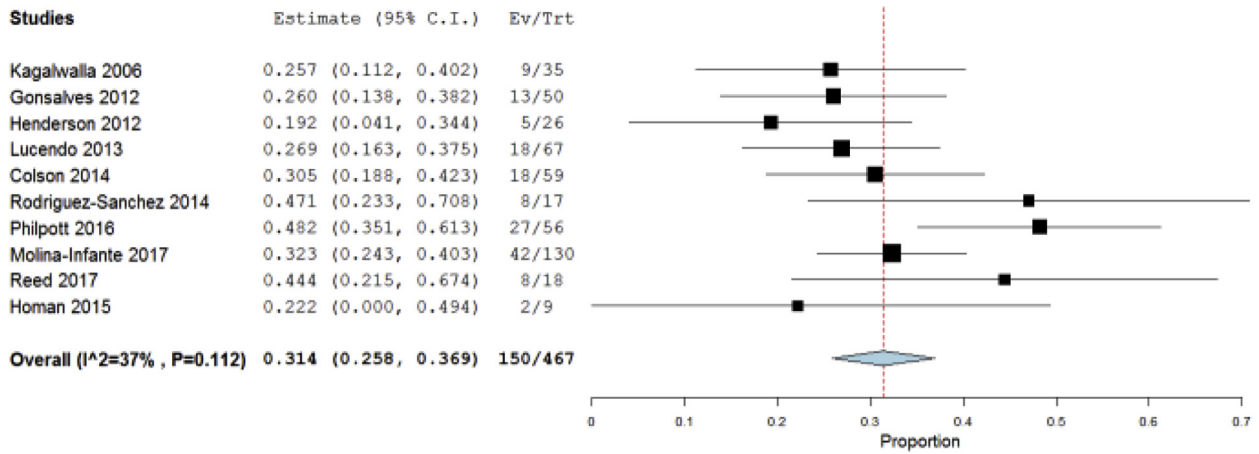

PICO Question 5a: 6-food elimination

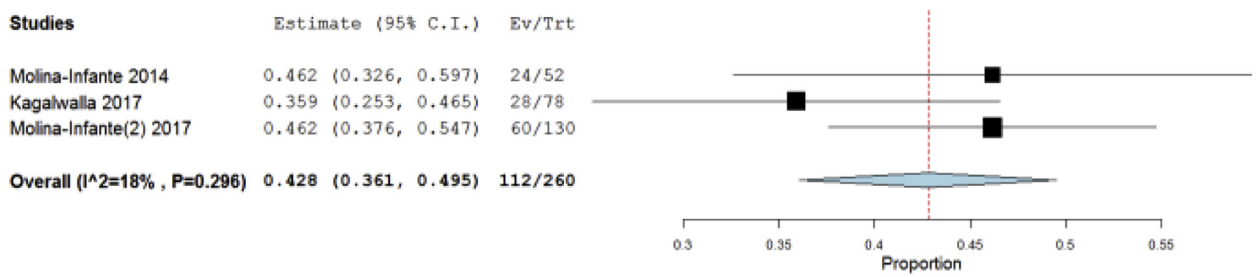

PICO Question 5b: 4-food elimination

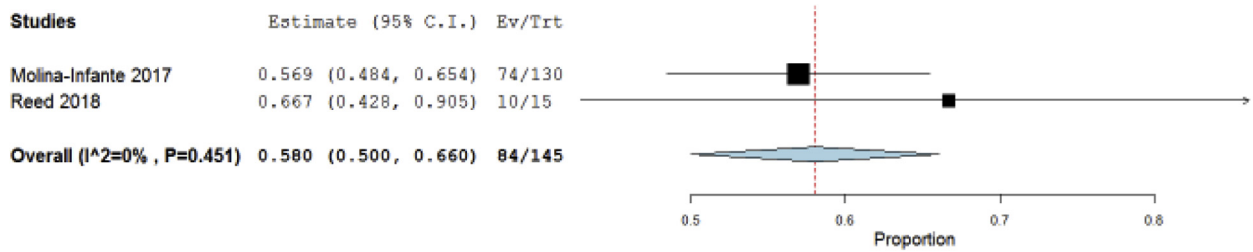

PICO Question 5c: 2-food elimination

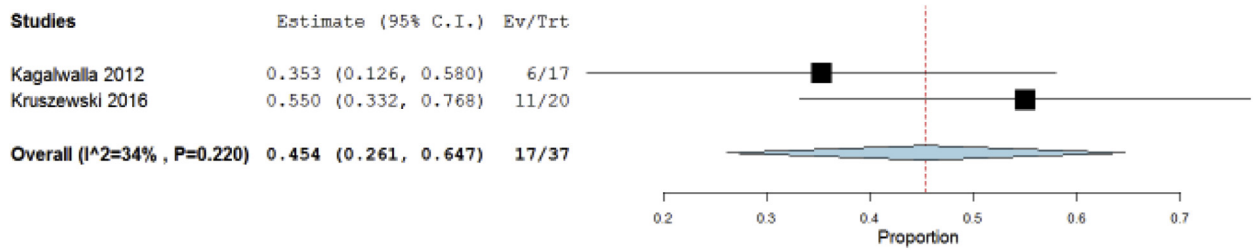

PICO Question 5d: Single-food elimination

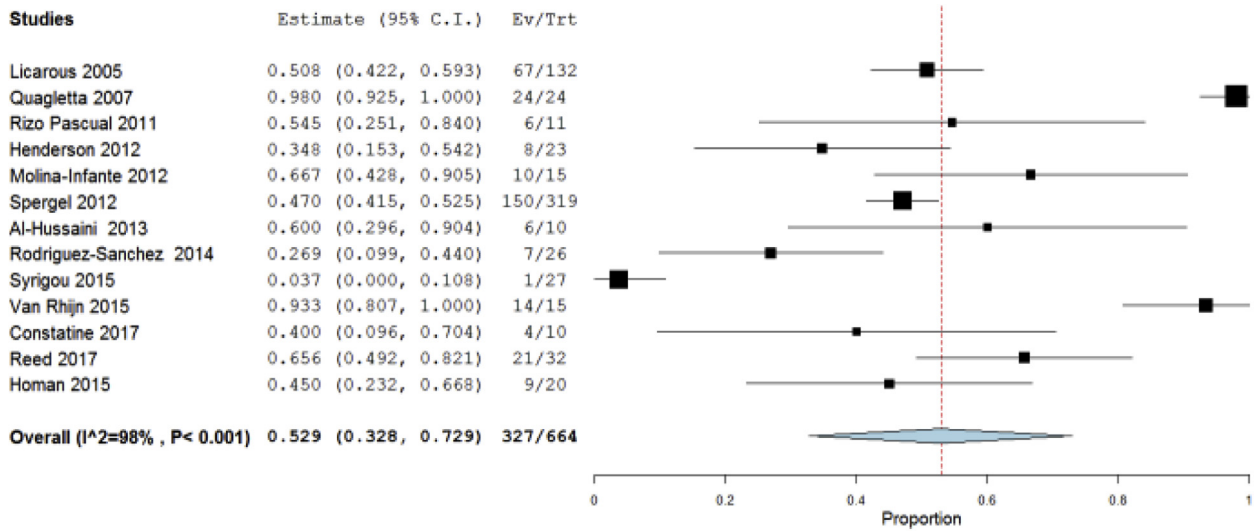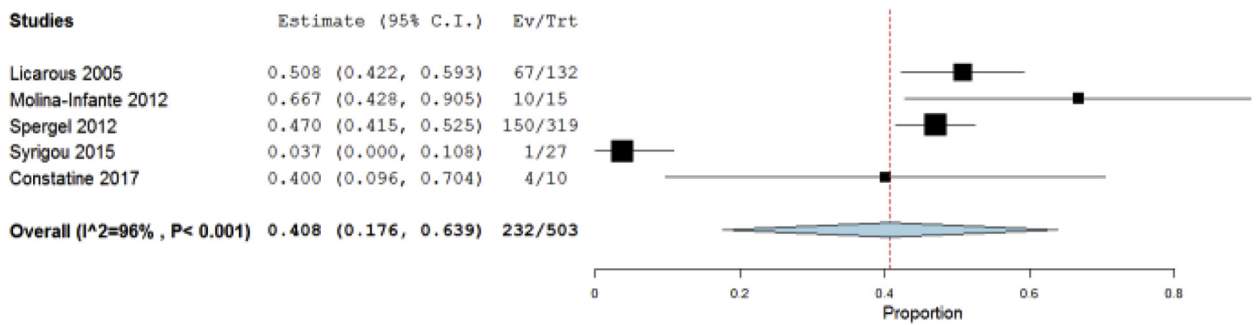

Studies including patch testing

| Studies                                          | Estimate (95% C.I.)         | Ev/Trt        |
|--------------------------------------------------|-----------------------------|---------------|
| Quagletta 2007                                   | 0.980 (0.925, 1.000)        | 24/24         |
| Rizo Pascual 2011                                | 0.545 (0.251, 0.840)        | 6/11          |
| Henderson 2012                                   | 0.348 (0.153, 0.542)        | 8/23          |
| Al-Hussaini 2013                                 | 0.600 (0.296, 0.904)        | 6/10          |
| Rodriguez-Sanchez 2014                           | 0.269 (0.099, 0.440)        | 7/26          |
| Van Rhijn 2015                                   | 0.933 (0.807, 1.000)        | 14/15         |
| Reed 2017                                        | 0.656 (0.492, 0.821)        | 21/32         |
| Homan 2015                                       | 0.450 (0.232, 0.668)        | 9/20          |
| <b>Overall (I<sup>2</sup>=94% , P&lt; 0.001)</b> | <b>0.605 (0.384, 0.827)</b> | <b>95/161</b> |

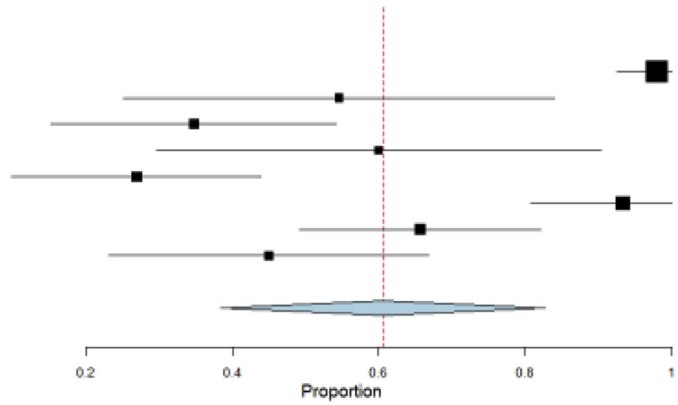

Studies not using patch testing

| Studies                                             | Estimate (95% C.I.)         | Ev/Trt         |
|-----------------------------------------------------|-----------------------------|----------------|
| Mernard-Katcher 2017                                | 0.851 (0.749, 0.953)        | 40/47          |
| Al-Hussaini 2016                                    | 0.975 (0.907, 1.000)        | 19/19          |
| Runge 2016                                          | 0.870 (0.841, 0.900)        | 423/486        |
| Kavitt 2015                                         | 0.941 (0.829, 1.000)        | 16/17          |
| Saligram 2014                                       | 0.988 (0.953, 1.000)        | 39/39          |
| Lipka 2014                                          | 0.847 (0.791, 0.903)        | 133/157        |
| Bohm 2010                                           | 0.909 (0.739, 1.000)        | 10/11          |
| Robles-Medranda 2010                                | 0.964 (0.867, 1.000)        | 13/13          |
| Pasha 2007                                          | 0.846 (0.650, 1.000)        | 11/13          |
| Lee 2007                                            | 0.753 (0.655, 0.852)        | 55/73          |
| Potter 2004                                         | 0.538 (0.267, 0.809)        | 7/13           |
| Croese 2003                                         | 0.931 (0.866, 0.996)        | 54/58          |
| Straumann 2003                                      | 0.909 (0.739, 1.000)        | 10/11          |
| Vassilopoulos 2002                                  | 0.938 (0.770, 1.000)        | 7/7            |
| <b>Overall (I<sup>2</sup>=7638 % , P&lt; 0.001)</b> | <b>0.897 (0.852, 0.941)</b> | <b>837/964</b> |

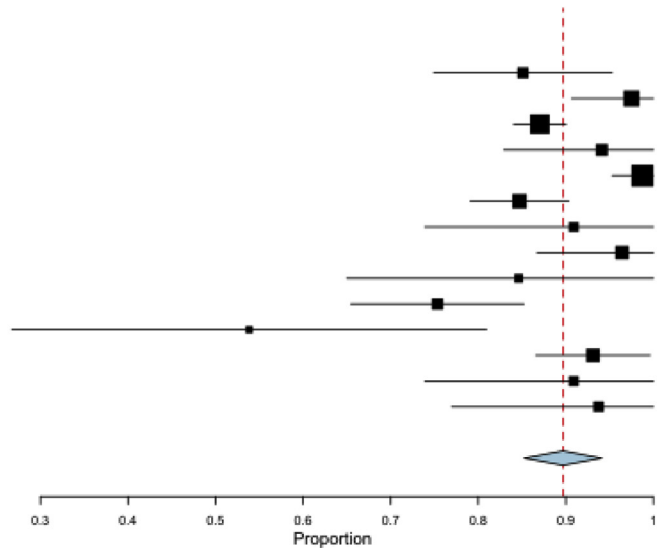

Clinical improvement

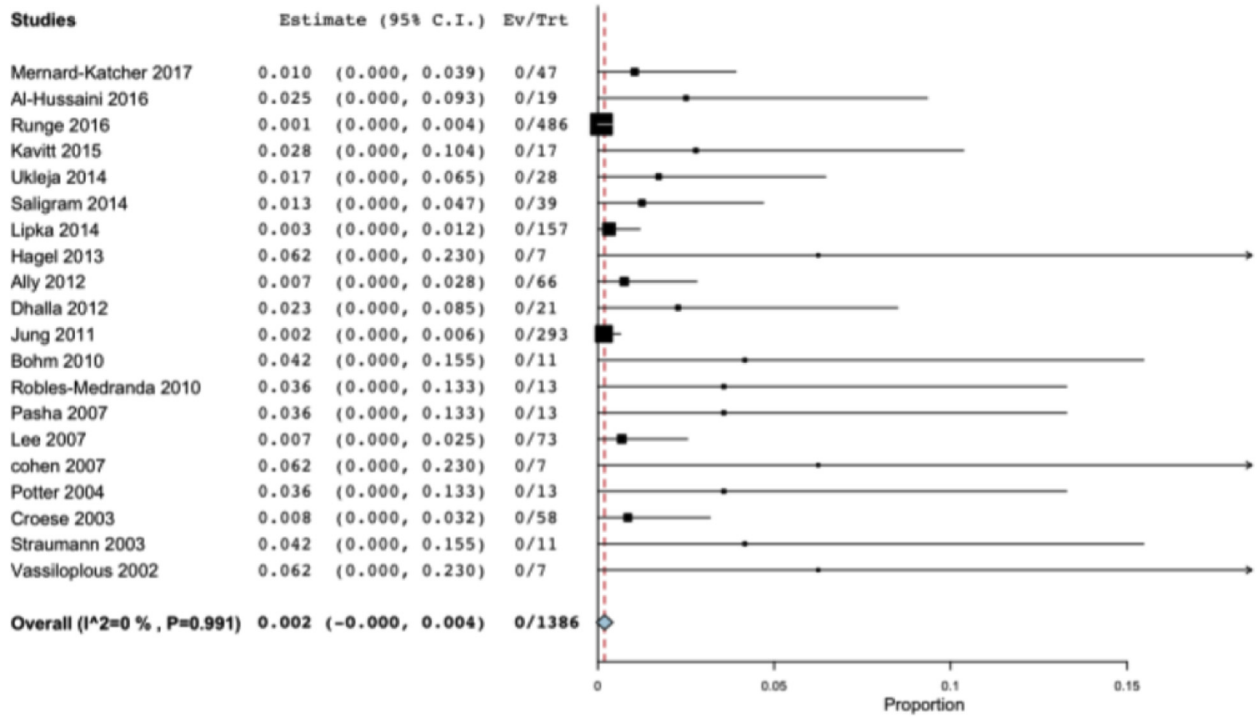

Mortality

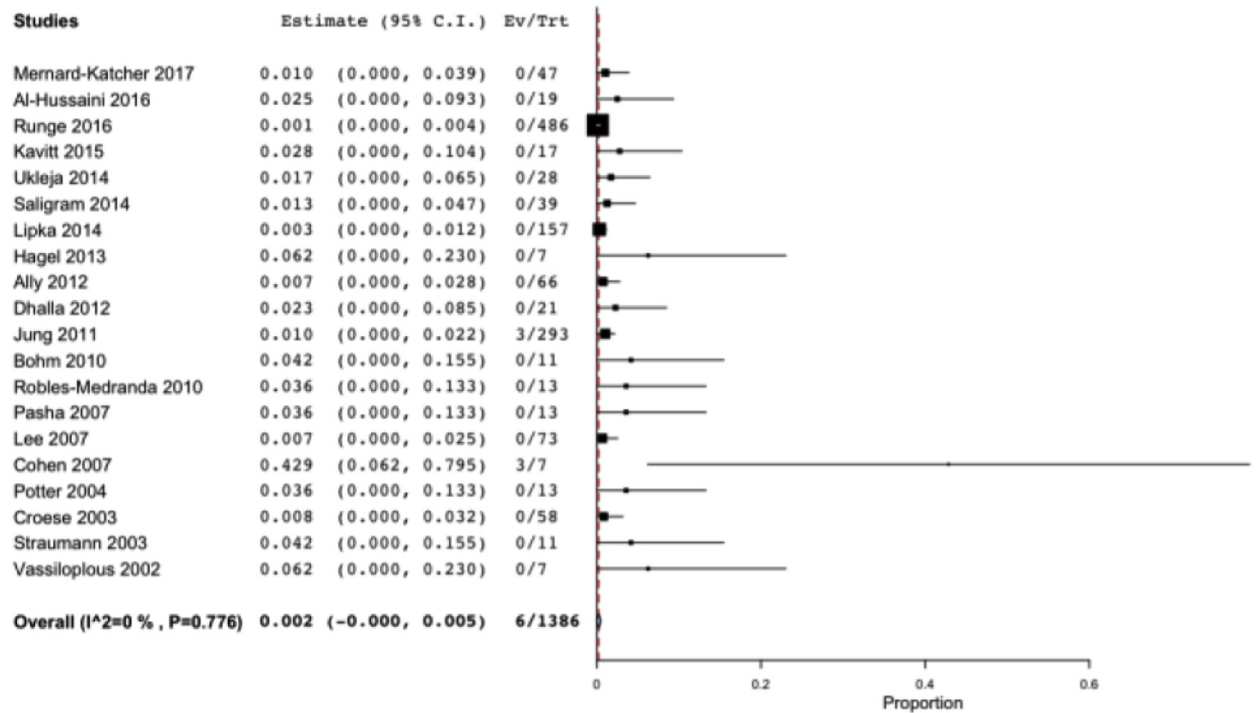

Perforation

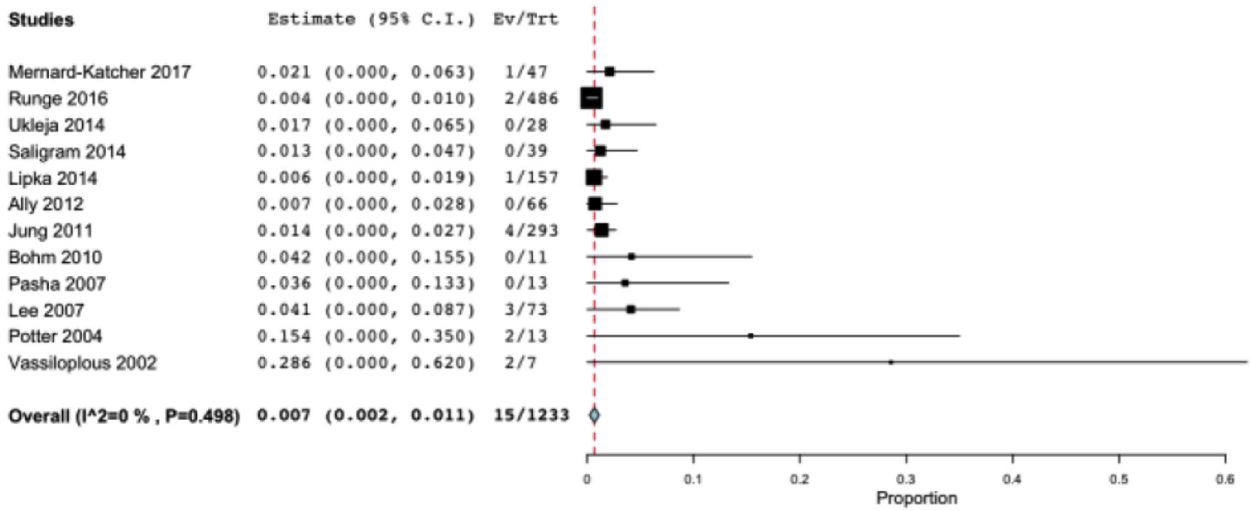

Hospitalizations

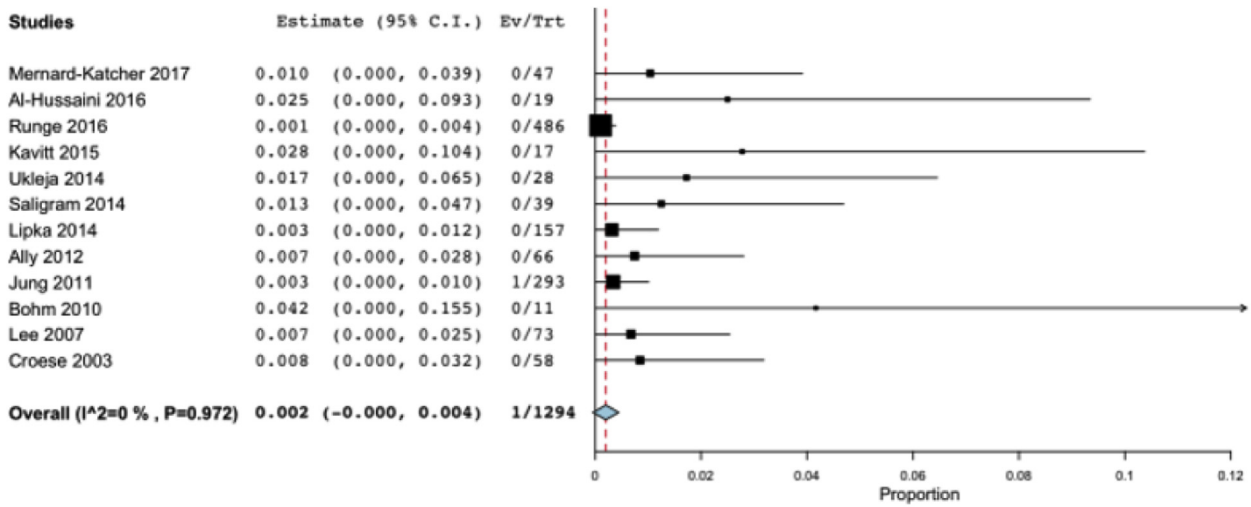

Hemorrhage



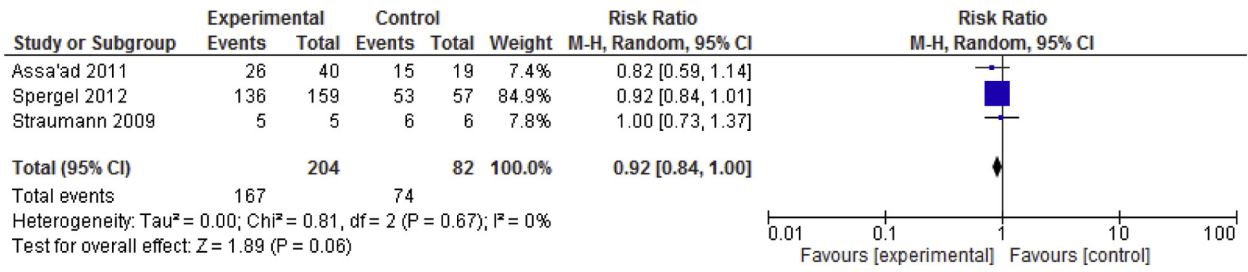

Supplement: NIHMS1689423-supplement-1.pdf [file NIHMS1689423-supplement-1.pdf]
